# Supplementary material
Source: PubMed Central journal article supplement (PMC5648534)
Supplement: NIHMS868131-supplement-3.pdf [file NIHMS868131-supplement-3.pdf]

**Supplemental Table 3** Risk of Primary Lung Squamous Cell Carcinoma in Patients With Previous Malignancy Stratified by Site of Initial Primary and Radiation Status

| First Primary Site   | All                    |                        |                               | No Radiation Therapy   |                        |                               | Radiation Therapy      |                        |                               |
|----------------------|------------------------|------------------------|-------------------------------|------------------------|------------------------|-------------------------------|------------------------|------------------------|-------------------------------|
|                      | Observed<br>(n = 9100) | Expected<br>(n = 7069) | SIR (99% CI)                  | Observed<br>(n = 5620) | Expected<br>(n = 4893) | SIR (99% CI)                  | Observed<br>(n = 3345) | Expected<br>(n = 2049) | SIR (99% CI)                  |
| Head and neck        | 1640                   | 225                    | 7.27 (6.82-7.75) <sup>a</sup> | 415                    | 90                     | 4.59 (4.03-5.20) <sup>a</sup> | 1201                   | 131                    | 9.17 (8.51-9.88) <sup>a</sup> |
| Colon and rectum     | 867                    | 819                    | 1.06 (0.97-1.15)              | 750                    | 727                    | 1.03 (0.94-1.13)              | 109                    | 85                     | 1.29 (0.99-1.64)              |
| Pancreas             | 21                     | 19                     | 1.12 (0.59-1.92)              | 14                     | 13                     | 1.09 (0.49-2.09)              | 7                      | 5                      | 1.3 (0.38-3.18)               |
| Lung and bronchus    | 1372                   | 270                    | 5.08 (4.73-5.44) <sup>a</sup> | 967                    | 186                    | 5.19 (4.77-5.63) <sup>a</sup> | 394                    | 78                     | 5.03 (4.40-5.72) <sup>a</sup> |
| Uterus               | 115                    | 171                    | 0.67 (0.52-0.85) <sup>b</sup> | 81                     | 124                    | 0.65 (0.48-0.86) <sup>b</sup> | 30                     | 44                     | 0.68 (0.40-1.08)              |
| Prostate             | 2263                   | 3093                   | 0.73 (0.69-0.77) <sup>b</sup> | 1216                   | 1884                   | 0.65 (0.60-0.69) <sup>b</sup> | 997                    | 1137                   | 0.88 (0.81-0.95) <sup>b</sup> |
| Bladder              | 823                    | 437                    | 1.88 (1.72-2.06) <sup>a</sup> | 796                    | 428                    | 1.86 (1.69-2.04) <sup>a</sup> | 26                     | 8                      | 3.33 (1.89-5.41) <sup>a</sup> |
| Kidney               | 146                    | 152                    | 0.96 (0.77-1.18)              | 145                    | 150                    | 0.97 (0.77-1.20)              | 0                      | 2                      | 0 (0.00-2.53)                 |
| Thyroid              | 59                     | 68                     | 0.87 (0.60-1.20)              | 29                     | 34                     | 0.85 (0.50-1.34)              | 30                     | 33                     | 0.92 (0.54-1.44)              |
| Breast               | 973                    | 995                    | 0.98 (0.90-1.06)              | 463                    | 501                    | 0.93 (0.82-1.04)              | 480                    | 467                    | 1.03 (0.91-1.16)              |
| Melanoma             | 307                    | 471                    | 0.65 (0.56-0.75) <sup>b</sup> | 300                    | 463                    | 0.65 (0.56-0.75) <sup>b</sup> | 6                      | 7                      | 0.88 (0.22-2.29)              |
| Leukemia or lymphoma | 514                    | 349                    | 1.47 (1.31-1.65) <sup>a</sup> | 444                    | 293                    | 1.52 (1.34-1.71) <sup>a</sup> | 65                     | 52                     | 1.24 (0.88-1.69)              |

Abbreviations: CI = confidence interval; SIR = standardized incidence ratio.

<sup>a</sup>Incidence rate significantly greater than expected (using exact method and 99% CIs).

<sup>b</sup>Incidence rate significantly lower than expected (using exact method and 99% CIs).
